# Supplementary material
Source: Springer Nature journal article supplement (https://www.springermedizin.de/resource/supplementary/12903_2008_120_MOESM3_ESM.pdf/9517366)

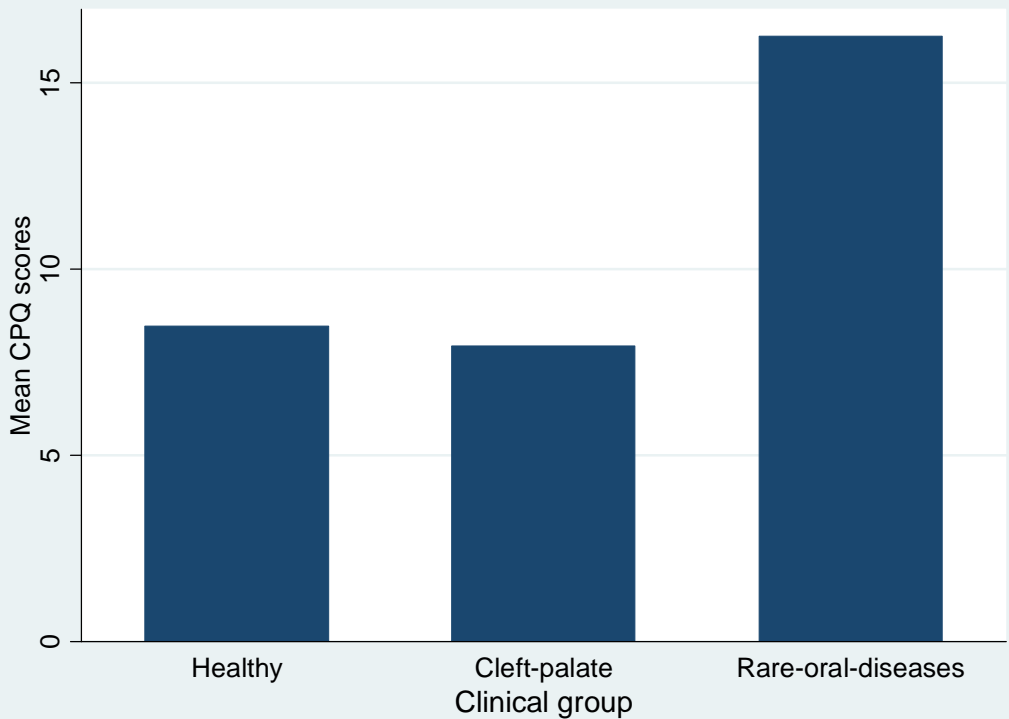

Supplement: MOESM3 [file 9517366]
